# Supplementary material for: Mitigation Actions Scenarios Applied to the Dairy Farm Management Systems
Source: MDPI journal article supplement (doi:10.3390/foods12091860), 2023-04-29
Supplement: s1 [file s1]

## Supplementary Materials

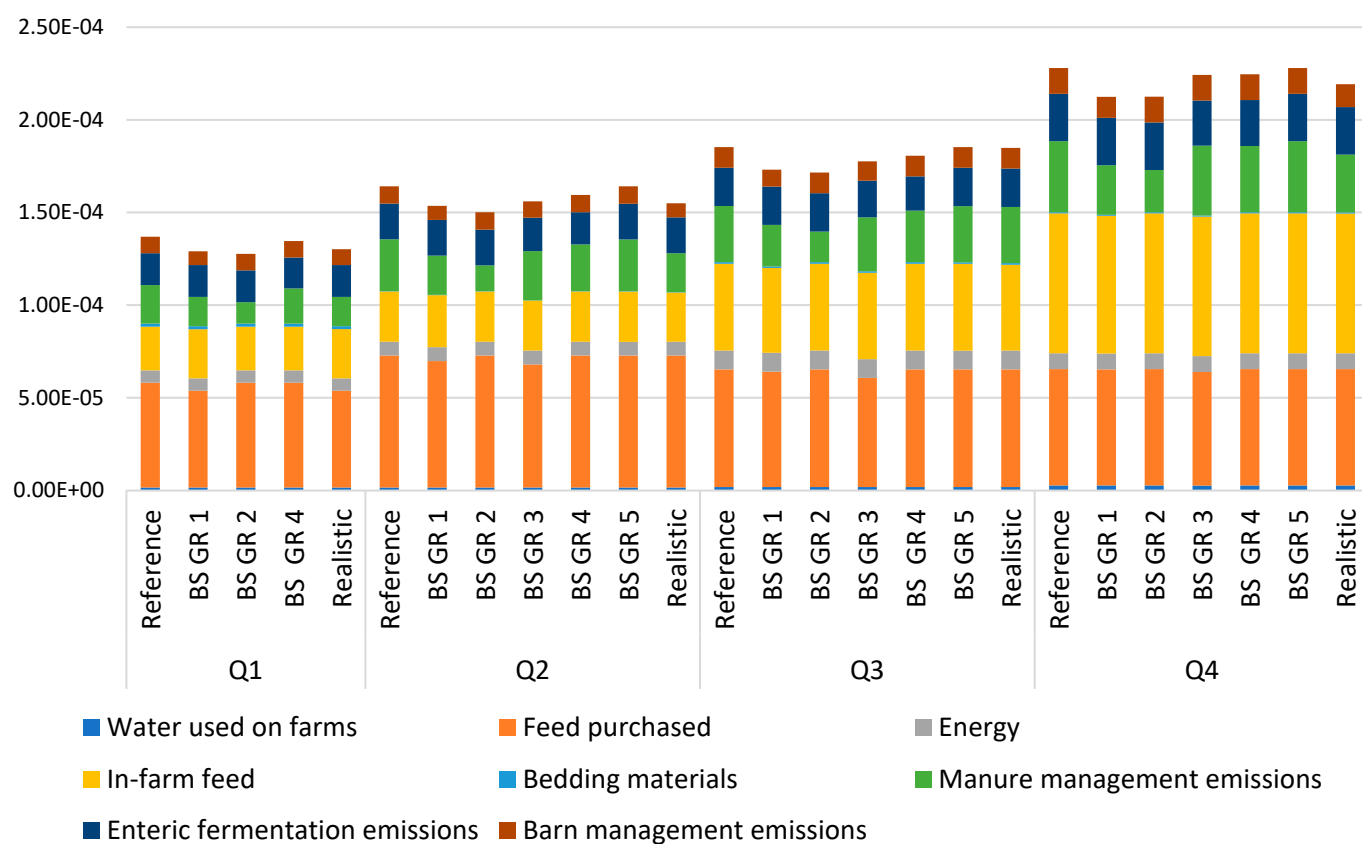

**Figure S1.** Potential reduction of the selected farm process by applying the five mitigation actions for the different Scenarios in each quartile Q1, Q2, Q3, Q4. Abbreviations: Reference: Reference Scenario; BS GR 1: Best-Case Scenario applying group 1; BS GR 2: Best-Case Scenario applying group 2; BS GR 3: Best-Case Scenario applying group 3; BS GR 4: Best-Case Scenario applying group 4; BS GR 5: Best-Case Scenario applying group 5; Realistic: Realistic Scenario.

**Table S1.** Weighted results per 1 of FPCM referred to the potential reduction of impact by applying the five mitigation actions for the different Scenarios in each quartile Q1, Q2, Q3, and Q4.

|    |           | CC       | OD       | IR, HH   | POF      | PM       | A        | FE       | ME       | LU       | WRD      | M-RD     | F-RD     | Total    |
|----|-----------|----------|----------|----------|----------|----------|----------|----------|----------|----------|----------|----------|----------|----------|
| Q1 | Reference | 4,15E-05 | 3,00E-09 | 1,79E-07 | 9,68E-06 | 8,81E-06 | 7,08E-06 | 1,38E-06 | 6,29E-06 | 1,53E-05 | 9,02E-06 | 3,27E-05 | 4,61E-06 | 3,49E-07 |
|    | BS GR 1   | 4,09E-05 | 2,78E-09 | 1,66E-07 | 8,10E-06 | 8,38E-06 | 6,29E-06 | 1,32E-06 | 5,92E-06 | 1,02E-05 | 8,53E-06 | 3,45E-05 | 4,35E-06 | 3,30E-07 |
|    | BS GR 2   | 3,24E-05 | 3,00E-09 | 1,79E-07 | 9,58E-06 | 8,81E-06 | 7,08E-06 | 1,38E-06 | 6,29E-06 | 1,53E-05 | 9,02E-06 | 3,27E-05 | 4,61E-06 | 3,49E-07 |
|    | BS GR 4   | 3,92E-05 | 3,00E-09 | 1,79E-07 | 9,65E-06 | 8,81E-06 | 7,08E-06 | 1,38E-06 | 6,29E-06 | 1,53E-05 | 9,02E-06 | 3,27E-05 | 4,61E-06 | 3,49E-07 |
|    | Realistic | 4,09E-05 | 2,78E-09 | 1,66E-07 | 9,25E-06 | 8,38E-06 | 6,29E-06 | 1,32E-06 | 5,92E-06 | 1,02E-05 | 8,53E-06 | 3,45E-05 | 4,35E-06 | 3,30E-07 |
| Q2 | Reference | 6,20E-05 | 2,02E-09 | 2,12E-07 | 1,00E-05 | 9,66E-06 | 7,22E-06 | 1,46E-06 | 6,77E-06 | 1,76E-05 | 1,18E-05 | 3,16E-05 | 5,39E-06 | 4,13E-07 |
|    | BS GR 1   | 6,14E-05 | 1,98E-09 | 2,03E-07 | 8,20E-06 | 9,32E-06 | 6,35E-06 | 1,42E-06 | 6,48E-06 | 1,06E-05 | 1,15E-05 | 3,25E-05 | 5,20E-06 | 3,79E-07 |
|    | BS GR 2   | 4,81E-05 | 2,02E-09 | 2,12E-07 | 9,83E-06 | 9,66E-06 | 7,22E-06 | 1,46E-06 | 6,77E-06 | 1,76E-05 | 1,18E-05 | 3,16E-05 | 5,39E-06 | 4,13E-07 |
|    | BS GR 3   | 5,91E-05 | 1,95E-09 | 2,02E-07 | 9,49E-06 | 9,10E-06 | 6,72E-06 | 1,38E-06 | 6,26E-06 | 1,63E-05 | 1,12E-05 | 3,07E-05 | 5,11E-06 | 3,99E-07 |
|    | BS GR 4   | 5,73E-05 | 2,02E-09 | 2,12E-07 | 9,94E-06 | 9,66E-06 | 7,22E-06 | 1,46E-06 | 6,77E-06 | 1,76E-05 | 1,18E-05 | 3,16E-05 | 5,39E-06 | 4,13E-07 |
|    | BS GR 5   | 6,19E-05 | 2,02E-09 | 2,12E-07 | 9,99E-06 | 9,66E-06 | 7,22E-06 | 1,46E-06 | 6,77E-06 | 1,76E-05 | 1,18E-05 | 3,16E-05 | 5,35E-06 | 4,13E-07 |
|    | Realistic | 6,18E-05 | 2,02E-09 | 2,12E-07 | 8,26E-06 | 9,65E-06 | 6,70E-06 | 1,46E-06 | 6,68E-06 | 1,09E-05 | 1,18E-05 | 3,16E-05 | 5,37E-06 | 4,08E-07 |
| Q3 | Reference | 5,69E-05 | 2,02E-09 | 2,09E-07 | 1,16E-05 | 1,07E-05 | 7,67E-06 | 1,67E-06 | 7,38E-06 | 2,05E-05 | 1,17E-05 | 5,11E-05 | 5,40E-06 | 4,06E-07 |
|    | BS GR 1   | 5,67E-05 | 1,94E-09 | 2,07E-07 | 9,61E-06 | 1,04E-05 | 6,83E-06 | 1,66E-06 | 7,24E-06 | 1,24E-05 | 1,14E-05 | 5,11E-05 | 5,33E-06 | 3,02E-07 |
|    | BS GR 2   | 4,33E-05 | 2,02E-09 | 2,09E-07 | 1,15E-05 | 1,07E-05 | 7,67E-06 | 1,67E-06 | 7,38E-06 | 2,05E-05 | 1,17E-05 | 5,11E-05 | 5,40E-06 | 4,06E-07 |
|    | BS GR 3   | 5,56E-05 | 1,91E-09 | 1,94E-07 | 1,10E-05 | 9,97E-06 | 7,06E-06 | 1,59E-06 | 6,98E-06 | 1,87E-05 | 1,13E-05 | 4,98E-05 | 5,11E-06 | 3,73E-07 |
|    | BS GR 4   | 5,24E-05 | 2,02E-09 | 2,09E-07 | 1,16E-05 | 1,07E-05 | 7,67E-06 | 1,67E-06 | 7,38E-06 | 2,05E-05 | 1,17E-05 | 5,11E-05 | 5,40E-06 | 4,06E-07 |
|    | BS GR 5   | 5,69E-05 | 2,02E-09 | 2,09E-07 | 1,16E-05 | 1,07E-05 | 7,67E-06 | 1,67E-06 | 7,38E-06 | 2,05E-05 | 1,17E-05 | 5,11E-05 | 5,37E-06 | 4,06E-07 |
|    | Realistic | 5,69E-05 | 2,02E-09 | 2,09E-07 | 1,16E-05 | 1,07E-05 | 7,64E-06 | 1,67E-06 | 7,38E-06 | 2,01E-05 | 1,17E-05 | 5,11E-05 | 5,40E-06 | 4,06E-07 |
| Q4 | Reference | 6,57E-05 | 2,33E-09 | 1,80E-07 | 1,35E-05 | 1,11E-05 | 7,91E-06 | 5,33E-06 | 7,28E-06 | 2,54E-05 | 1,91E-05 | 6,67E-05 | 5,11E-06 | 6,29E-07 |
|    | BS GR 1   | 6,57E-05 | 2,32E-09 | 1,80E-07 | 1,09E-05 | 1,11E-05 | 7,03E-06 | 5,33E-06 | 6,24E-06 | 1,45E-05 | 1,91E-05 | 6,67E-05 | 5,11E-06 | 6,18E-07 |
|    | BS GR 2   | 5,03E-05 | 2,33E-09 | 1,80E-07 | 1,33E-05 | 1,11E-05 | 7,91E-06 | 5,33E-06 | 7,28E-06 | 2,54E-05 | 1,91E-05 | 6,67E-05 | 5,11E-06 | 6,29E-07 |
|    | BS GR 3   | 6,36E-05 | 2,48E-09 | 1,82E-07 | 1,35E-05 | 1,10E-05 | 7,89E-06 | 5,28E-06 | 6,96E-06 | 2,54E-05 | 1,89E-05 | 6,59E-05 | 5,07E-06 | 6,58E-07 |
|    | BS GR 4   | 6,23E-05 | 2,33E-09 | 1,80E-07 | 1,35E-05 | 1,11E-05 | 7,91E-06 | 5,33E-06 | 7,28E-06 | 2,54E-05 | 1,91E-05 | 6,67E-05 | 5,11E-06 | 6,29E-07 |
|    | BS GR 5   | 6,57E-05 | 2,33E-09 | 1,80E-07 | 1,35E-05 | 1,11E-05 | 7,90E-06 | 5,33E-06 | 7,28E-06 | 2,54E-05 | 1,91E-05 | 6,67E-05 | 5,10E-06 | 6,29E-07 |
|    | Realistic | 6,57E-05 | 2,33E-09 | 1,80E-07 | 1,19E-05 | 1,11E-05 | 7,39E-06 | 5,33E-06 | 7,28E-06 | 1,87E-05 | 1,91E-05 | 6,67E-05 | 5,11E-06 | 6,29E-07 |
